# Supplementary material for: Biological Control and Cross Infections of the Neofusicoccum spp. Causing Mango Postharvest Rots in Spain
Source: MDPI journal article supplement (doi:10.3390/horticulturae10020166), 2024-02-11
Supplement: s1 [file s1]

# Supplementary Table

Table S1. Information obtained from fungal isolated ITS and beta-tubulin sequence comparison in NCBI database and was considered for fungal isolated identification.

| N°                   | Isolated code | Query cover | E-value | %. Identity | Subject Fungal Specie              | Accession number |
|----------------------|---------------|-------------|---------|-------------|------------------------------------|------------------|
| <b>ITS sequences</b> |               |             |         |             |                                    |                  |
| 1                    | UMAF M1301    | 98          | 0.0     | 99.63       | <i>Stemphylium vesicarium</i>      | MF401513         |
| 2                    | UMAF M1302    | 99          | 0.0     | 99.95       | <i>Neofusicoccum parvum</i>        | MN654323         |
| 3                    | UMAF M1303    | 98          | 0.0     | 99.63       | <i>Stemphylium botryosum</i>       | MK226299         |
| 4                    | UMAF M1304    | 99          | 0.0     | 99.63       | <i>Stemphylium botryosum</i>       | MK226299         |
| 5                    | UMAF M1305    | 98          | 0.0     | 100         | <i>Stemphylium sp.</i>             | MN153952         |
| 6                    | UMAF M1306    | 98          | 0.0     | 99.63       | <i>Alternaria alternata</i>        | MT447475         |
| 7                    | UMAF M1307    | 98          | 0.0     | 98.33       | <i>Stemphylium vesicarium</i>      | MN519408         |
| 8                    | UMAF M1308    | 98          | 0.0     | 100         | <i>Stemphylium vesicarium</i>      | MH628104         |
| 9                    | UMAF M1309    | 100         | 0.0     | 99.58       | <i>Stemphylium vesicarium</i>      | MF401574.1       |
| 10                   | UMAF M1310    | 99          | 1e-171  | 99.41       | <i>Alternaria alternata</i>        | KX179485         |
| 11                   | UMAF M1911    | 99          | 1e-79   | 94.39       | <i>Aureobasidium pullulans</i>     | MN398509         |
| 12                   | UMAF M1912    | 99          | 0.0     | 99.45       | <i>Aureobasidium pullulans</i>     | KR704881         |
| 13                   | UMAF M1913    | 100         | 4e-120  | 97.30       | <i>Alternaria tenuissima</i>       | MN853399         |
| 14                   | UMAF M1914    | 98          | 0.0     | 100         | <i>Aureobasidium pullulans</i>     | MN371874         |
| 15                   | UMAF M1915    | 100         | 0.0     | 99.35       | <i>Alternaria carthami</i>         | MK102650         |
| 16                   | UMAF M1916    | 99          | 0.0     | 99.44       | <i>Alternaria brassicicola</i>     | MF462314         |
| 17                   | UMAF M1917    | 99          | 0.0     | 99.45       | <i>Stemphylium vesicarium</i>      | MN328386         |
| 18                   | UMAF M1918    | 100         | 9e-158  | 98.75       | <i>Alternaria pobletensis</i>      | NR166226         |
| 19                   | UMAF M1919    | 100         | 0.0     | 98.96       | <i>Stemphylium vesicarium</i>      | MN534849         |
| 20                   | UMAF M1920    | 99          | 0.0     | 100         | <i>Botryosphaeria dothidea</i>     | MF398854         |
| 21                   | UMAF M1921    | 83          | 4e-133  | 98.90       | <i>Neofusicoccum mediterraneum</i> | KU721871         |

|    |               |     |        |       |                                           |          |
|----|---------------|-----|--------|-------|-------------------------------------------|----------|
| 22 | UMAF<br>M1922 | 79  | 0.0    | 97.44 | <i>Aureobasidium pullulans</i>            | FJ150904 |
| 23 | UMAF<br>M1923 | 100 | 4e-140 | 91.83 | <i>Aureobasidium pullulans</i>            | AM076662 |
| 24 | UMAF<br>M1924 | 100 | 0.0    | 100   | <i>Nigrospora oryzae</i>                  | MN648321 |
| 25 | UMAF<br>M1925 | 91  | 9e-101 | 98.15 | <i>Colletotrichum<br/>gloeosporioides</i> | MN473209 |
| 26 | UMAF<br>M1926 | 90  | 2e-87  | 97.44 | <i>Colletotrichum<br/>gloeosporioides</i> | MN473209 |
| 27 | UMAF<br>M1927 | 99  | 0.0    | 100   | <i>Neofusicoccum luteum</i>               | MG547970 |
| 28 | UMAF<br>M1928 | 100 | 0.0    | 99.82 | <i>Neofusicoccum parvum</i>               | MK932726 |
| 29 | UMAF<br>M1929 | 100 | 0.0    | 99.82 | <i>Neofusicoccum parvum</i>               | MK932726 |
| 30 | UMAF<br>M1930 | 98  | 1e-147 | 94.35 | <i>Stemphylium versicarium</i>            | MT629829 |
| 31 | UMAF<br>M1931 | 90  | 0.0    | 100   | <i>Alternaria tenuissima</i>              | KR912298 |
| 32 | UMAF<br>M1932 | 98  | 3e-147 | 98.36 | <i>Alternaria tenuissima</i>              | MN752163 |
| 33 | UMAF<br>M1933 | 100 | 0.0    | 99.47 | <i>Alternaria tenuissima</i>              | MF574271 |
| 34 | UMAF<br>M1934 | 99  | 0.0    | 99.81 | <i>Alternaria alternata</i>               | KX783399 |
| 35 | UMAF<br>M1935 | 100 | 0.0    | 99.80 | <i>Alternaria alternata</i>               | MT644140 |
| 36 | UMAF<br>M1936 | 99  | 0.0    | 99.81 | <i>Alternaria tenuissima</i>              | MH345863 |
| 37 | UMAF<br>M1937 | 98  | 0.0    | 99.10 | <i>Neofusicoccum parvum</i>               | MK932726 |
| 38 | UMAF<br>M1938 | 100 | 0.0    | 99.63 | <i>Neofusicoccum<br/>mediterraneum</i>    | MT252673 |
| 39 | UMAF<br>M1939 | 99  | 0.0    | 100   | <i>Alternaria tenuissima</i>              | KR912298 |
| 40 | UMAF<br>M1940 | 99  | 0.0    | 99.81 | <i>Alternaria alternata</i>               | KX783399 |
| 41 | UMAF<br>M1941 | 99  | 0.0    | 99.45 | <i>Alternaria tenuissima</i>              | MV907695 |
| 42 | UMAF<br>M1942 | 100 | 0.0    | 99.08 | <i>Alternaria tenuissima</i>              | MN206864 |
| 43 | UMAF<br>M1943 | 100 | 0.0    | 99.63 | <i>Alternaria tenuissima</i>              | MN907695 |
| 44 | UMAF<br>M1944 | 99  | 0.0    | 99.81 | <i>Alternaria tenuissima</i>              | HQ647307 |
| 45 | UMAF<br>M1945 | 99  | 0.0    | 99.43 | <i>Neofusicoccum<br/>mediterraneum</i>    | KX505909 |
| 46 | UMAF<br>M1946 | 98  | 0.0    | 100   | <i>Alternaria tenuissima</i>              | KX065045 |

|    |               |     |        |       |                                           |          |
|----|---------------|-----|--------|-------|-------------------------------------------|----------|
| 47 | UMAF<br>M1947 | 100 | 3e-136 | 96.37 | <i>Neofusicoccum australe</i>             | MK932744 |
| 48 | UMAF<br>M1948 | 99  | 0.0    | 100   | <i>Alternaria alternata</i>               | KF293964 |
| 49 | UMAF<br>M1949 | 99  | 0.0    | 99.64 | <i>Neofusicoccum luteum</i>               | MG547970 |
| 50 | UMAF<br>M1950 | 99  | 0.0    | 99.81 | <i>Alternaria tenuissima</i>              | MH345863 |
| 51 | UMAF<br>M1951 | 99  | 0.0    | 99.45 | <i>Alternaria alternata</i>               | MH879772 |
| 52 | UMAF<br>M1952 | 99  | 0.0    | 99.80 | <i>Nigrospora laticolonia</i>             | MT043787 |
| 53 | UMAF<br>M1953 | 100 | 0.0    | 99.63 | <i>Alternaria tenuissima</i>              | MN206864 |
| 54 | UMAF<br>M1954 | 99  | 0.0    | 99.75 | <i>Rosellinia convexa</i>                 | MN707567 |
| 55 | UMAF<br>M1955 | 83  | 0.0    | 99.36 | <i>Xylaria</i> sp.                        | KU295384 |
| 56 | UMAF<br>M1956 | 99  | 0.0    | 99.65 | <i>Trichoderma atroviride</i>             | MN516446 |
| 57 | UMAF<br>M1957 | 99  | 0.0    | 99.63 | <i>Alternaria tenuissima</i>              | MG975636 |
| 58 | UMAF<br>M1958 | 98  | 0.0    | 99.81 | <i>Colletotrichum<br/>gloeosporioides</i> | KM203586 |
| 59 | UMAF<br>M1959 | 98  | 0.0    | 99.81 | <i>Colletotrichum<br/>gloeosporioides</i> | KM203586 |
| 60 | UMAF<br>M1960 | 99  | 0.0    | 99.60 | <i>Neofusicoccum<br/>mediterraneum</i>    | MN166003 |
| 61 | UMAF<br>M1961 | 99  | 0.0    | 99.82 | <i>Neofusicoccum australe</i>             | KF702388 |
| 62 | UMAF<br>M1962 | 99  | 0.0    | 99.81 | <i>Alternaria tenuissima</i>              | JK867218 |
| 63 | UMAF<br>M1963 | 100 | 0.0    | 99.82 | <i>Neofusicoccum parvum</i>               | MK932726 |
| 64 | UMAF<br>M1964 | 99  | 0.0    | 99.82 | <i>Neofusicoccum parvum</i>               | MK932726 |
| 65 | UMAF<br>M1965 | 100 | 0.0    | 99.81 | <i>Alternaria tenuissima</i>              | MT487771 |
| 66 | UMAF<br>M1966 | 98  | 0.0    | 99.82 | <i>Neofusicoccum parvum</i>               | MN893926 |
| 67 | UMAF<br>M1967 | 100 | 0.0    | 99.61 | <i>Lasiodiplodia theobromae</i>           | MK530072 |
| 68 | UMAF<br>M1968 | 98  | 0.0    | 98.92 | <i>Fusarium oxysporum</i>                 | KT876557 |
| 69 | UMAF<br>M1969 | 89  | 0.0    | 99.00 | <i>Alternaria tenuissima</i>              | MN853397 |
| 70 | UMAF<br>M1970 | 82  | 3e-168 | 98.54 | <i>Fusarium verticillioides</i>           | MN737769 |
| 71 | UMAF<br>M1971 | 99  | 0.0    | 99.82 | <i>Pestalotiopsis<br/>trachicarpicola</i> | MN427963 |

|                               |               |     |        |       |                                         |            |
|-------------------------------|---------------|-----|--------|-------|-----------------------------------------|------------|
| 72                            | UMAF<br>M1972 | 95  | 1e-157 | 96.00 | <i>Lasiodiplodia citricola</i>          | MN634040   |
| 73                            | UMAF<br>M1973 | 99  | 0.0    | 99.81 | <i>Alternaria alternata</i>             | MN173832   |
| 74                            | UMAF<br>M1974 | 100 | 0.0    | 99.82 | <i>Trichoderma gamsii</i>               | KX343104   |
| 75                            | UMAF<br>M1975 | 99  | 0.0    | 98.04 | <i>Alternaria alternata</i>             | MT134992   |
| <b>Beta-tubulin sequences</b> |               |     |        |       |                                         |            |
| 1                             | UMAF<br>M1302 | 100 | 1e-170 | 100   | <i>Neofusicoccum parvum</i>             | OQ361698.1 |
| 2                             | UMAF<br>M1928 | 100 | 9e-148 | 94.99 | <i>Neofusicoccum parvum</i>             | KP183115.1 |
| 3                             | UMAF<br>M1937 | 100 | 1e-120 | 98.08 | <i>Neofusicoccum parvum</i>             | KP183108.1 |
| 4                             | UMAF<br>M1938 | 100 | 2e-95  | 98.57 | <i>Neofusicoccum<br/>mediterraneum</i>  | KX505926.1 |
| 5                             | UMAF<br>M1945 | 100 | 2e-130 | 99.26 | <i>Neofusicoccum<br/>mediterraneum</i>  | MN318104.1 |
| 6                             | UMAF<br>M1961 | 97  | 9e-102 | 95.42 | <i>Neofusicoccum<br/>cryptoaustrale</i> | KY000212.1 |

---
