# Supplementary material for: Biological Control and Cross Infections of the Neofusicoccum spp. Causing Mango Postharvest Rots in Spain
Source: MDPI journal article supplement (doi:10.3390/horticulturae10020166), 2024-02-11
Supplement: s1 [file s1]

Preventive Treatment

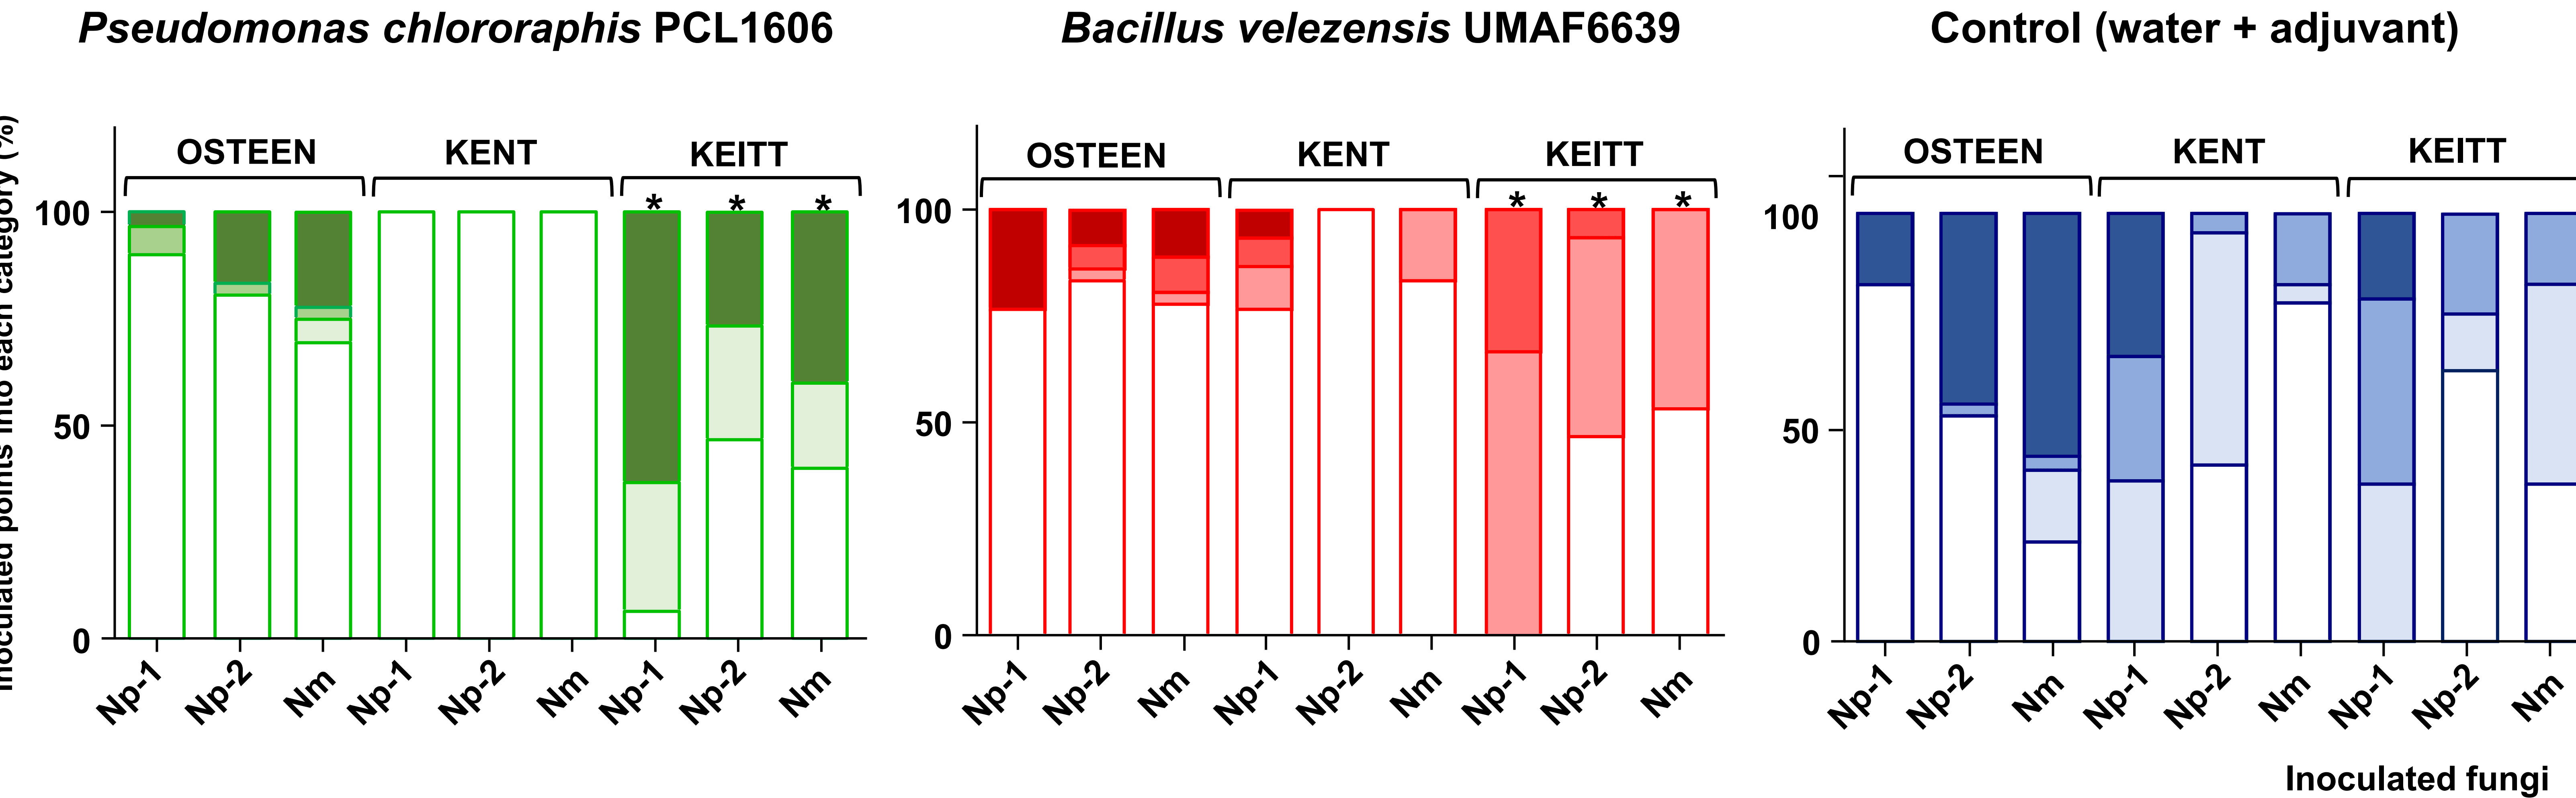

Curative Treatment

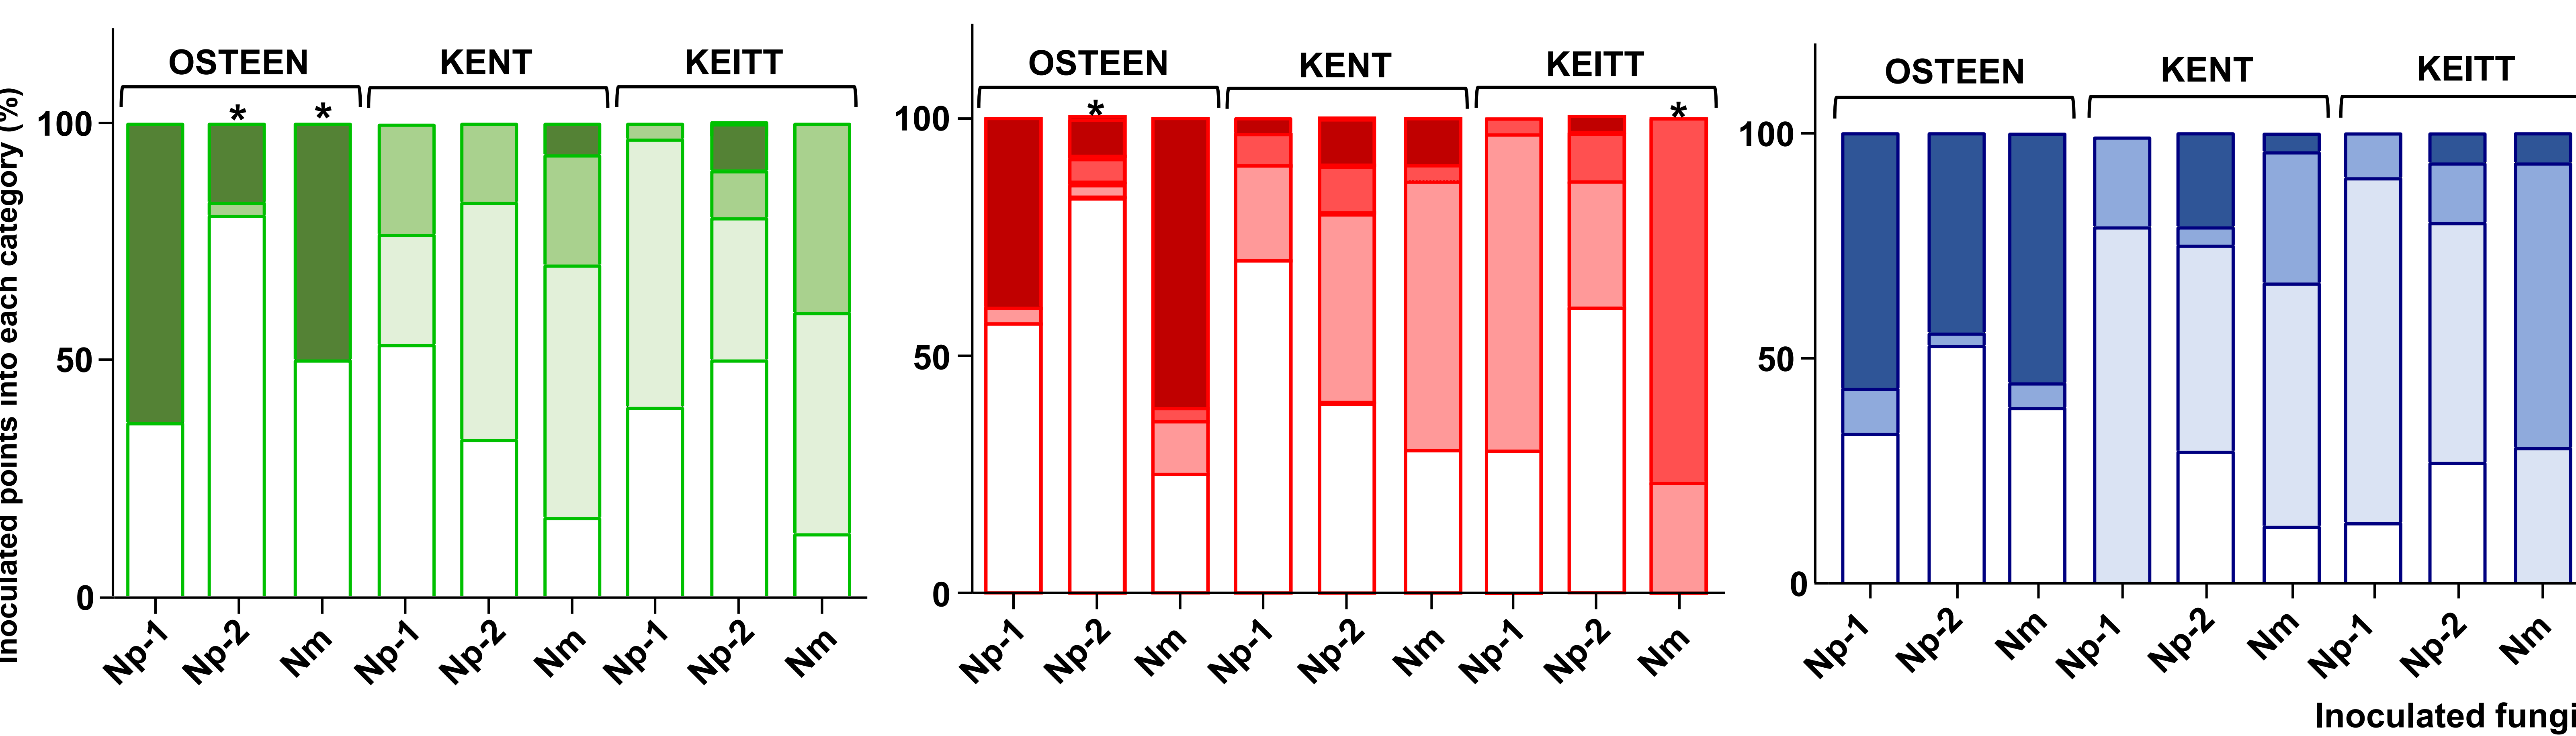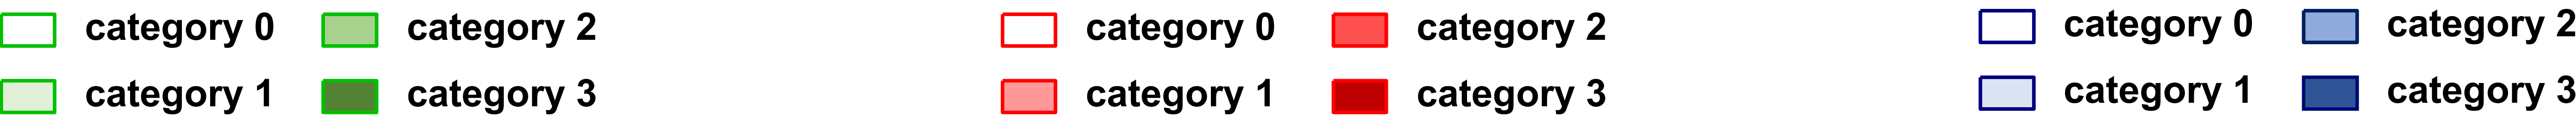

Np-1: *Neofusicoccum parvum* UMAF M1937  
Np-2: *Neofusicoccum parvum* UMAF M1302  
Nm: *Neofusicoccum mediterraneum* UMAF M1938
