# Supplementary figures and images for: Biological Control and Cross Infections of the Neofusicoccum spp. Causing Mango Postharvest Rots in Spain
Source: MDPI journal article supplement (doi:10.3390/horticulturae10020166), 2024-02-11

Dual Antagonism

A

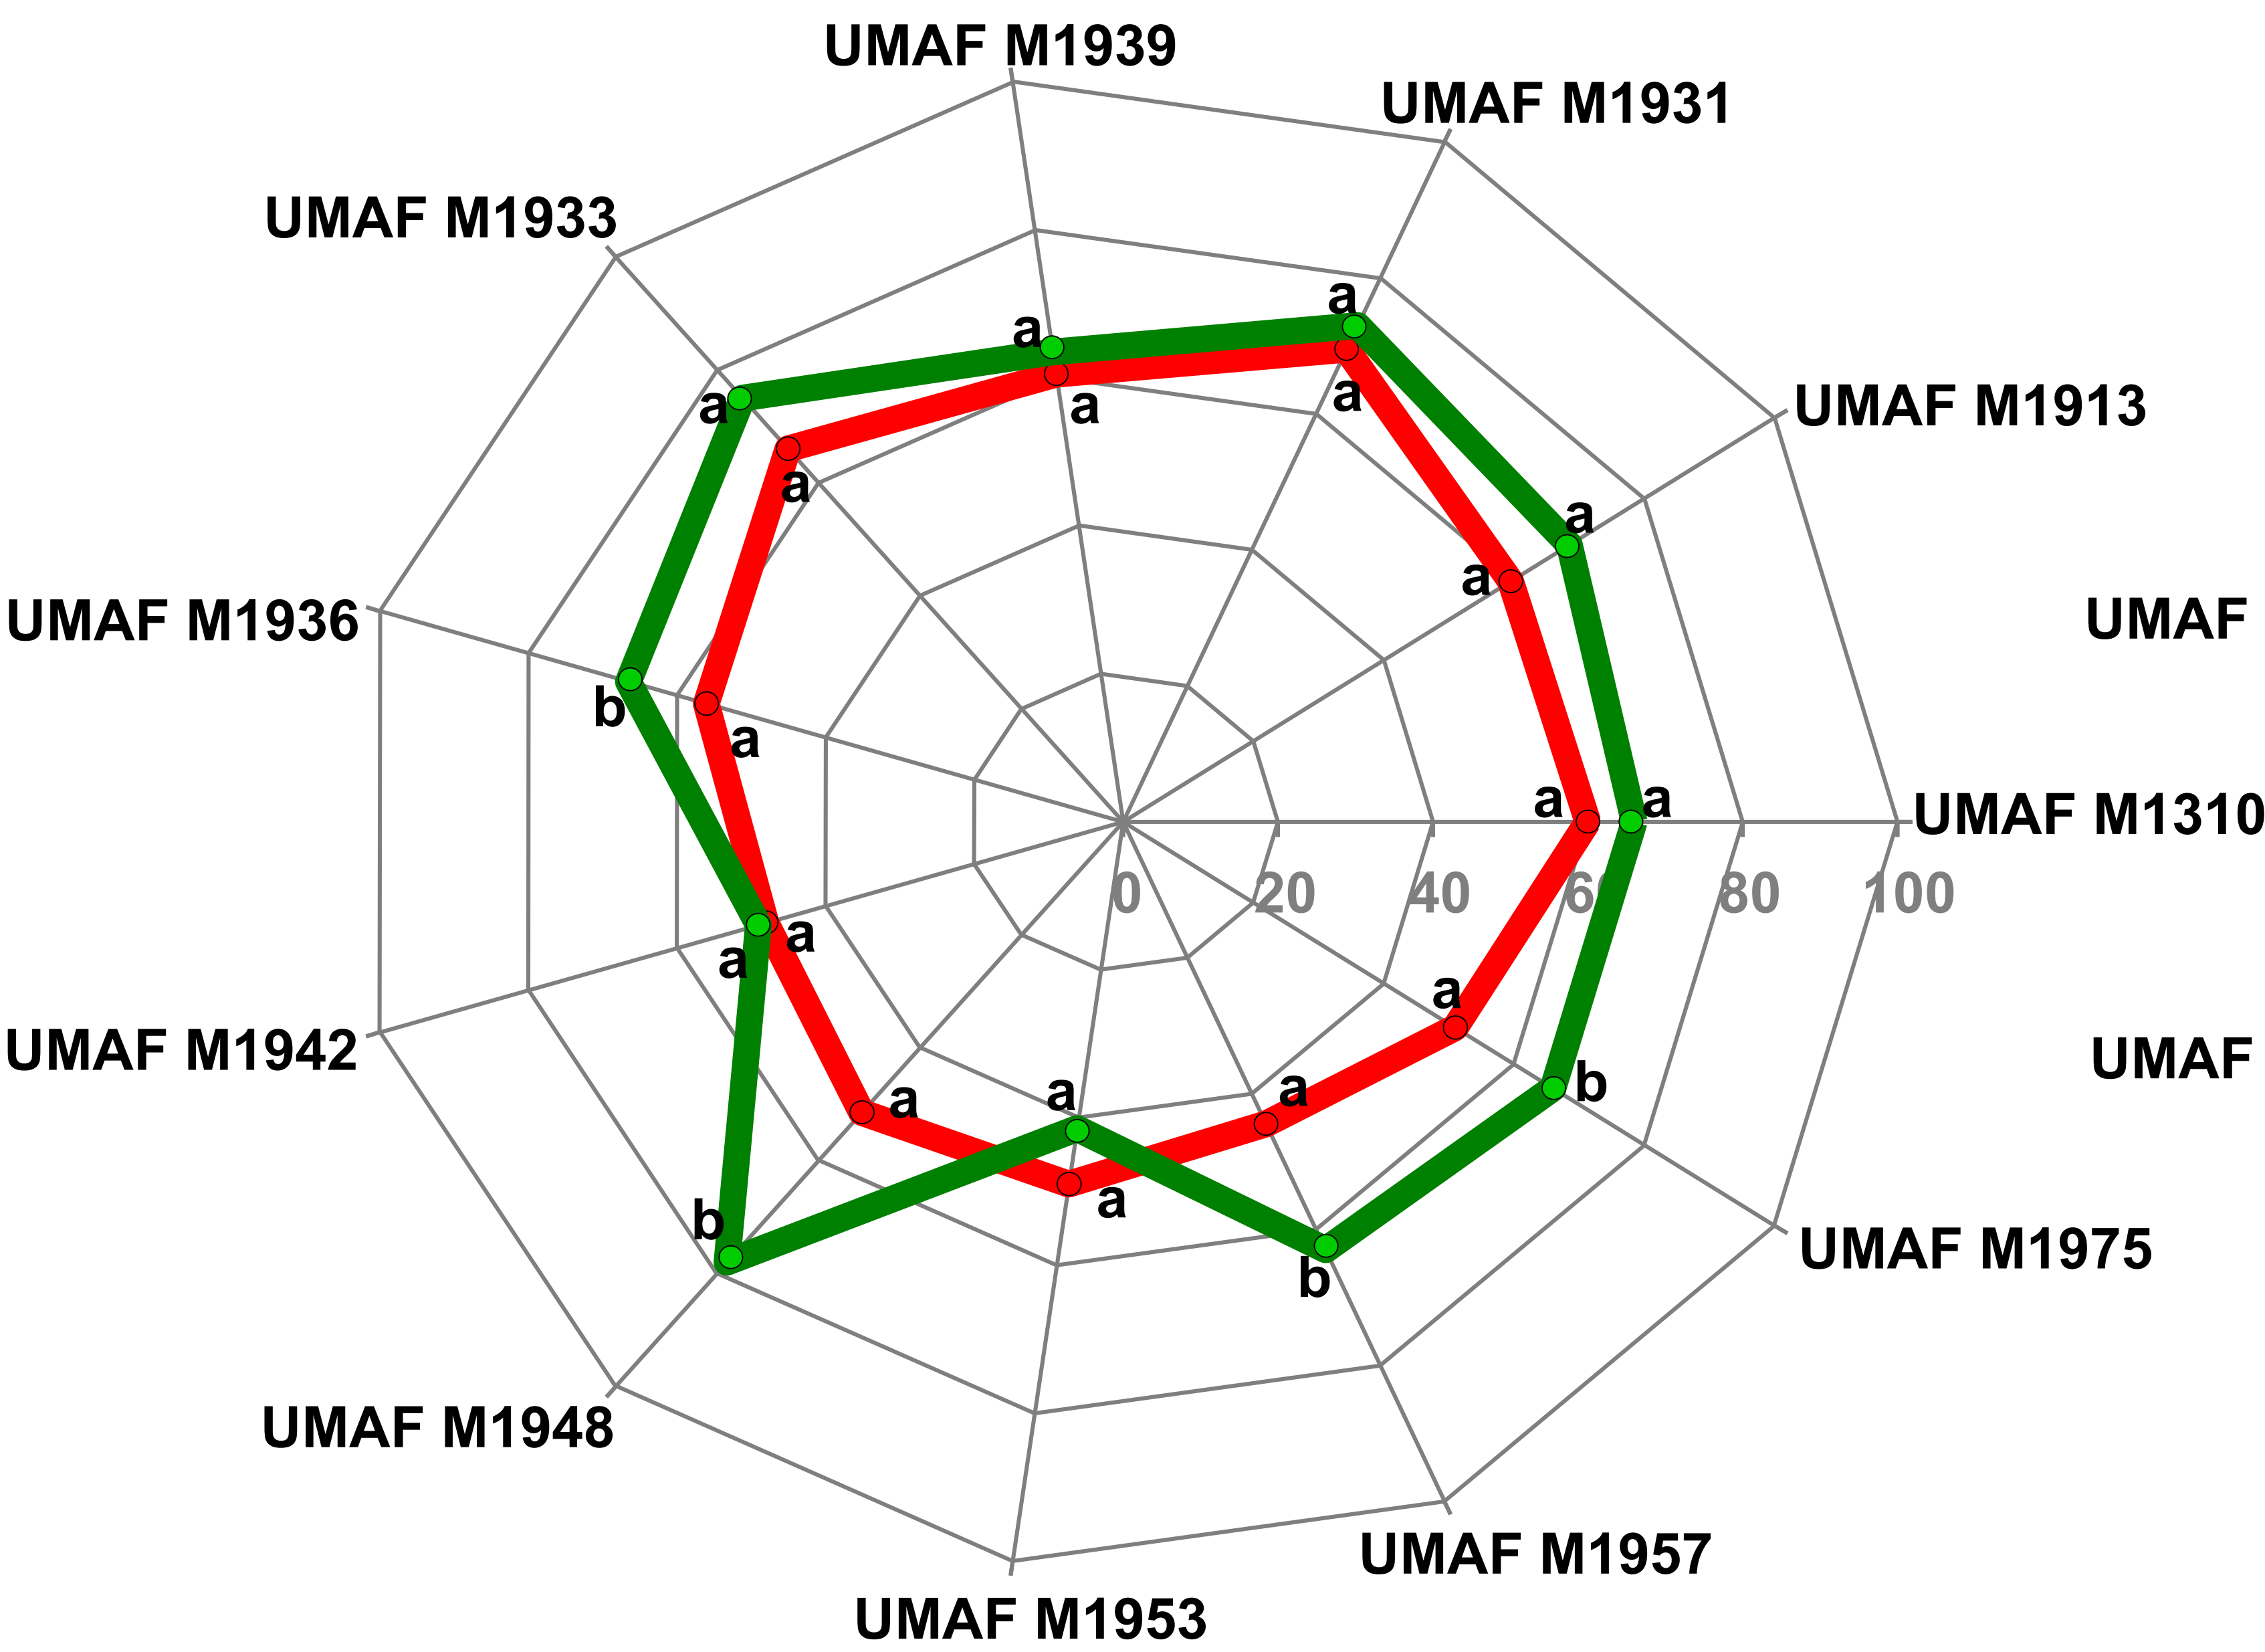

Volatile Antagonism

D

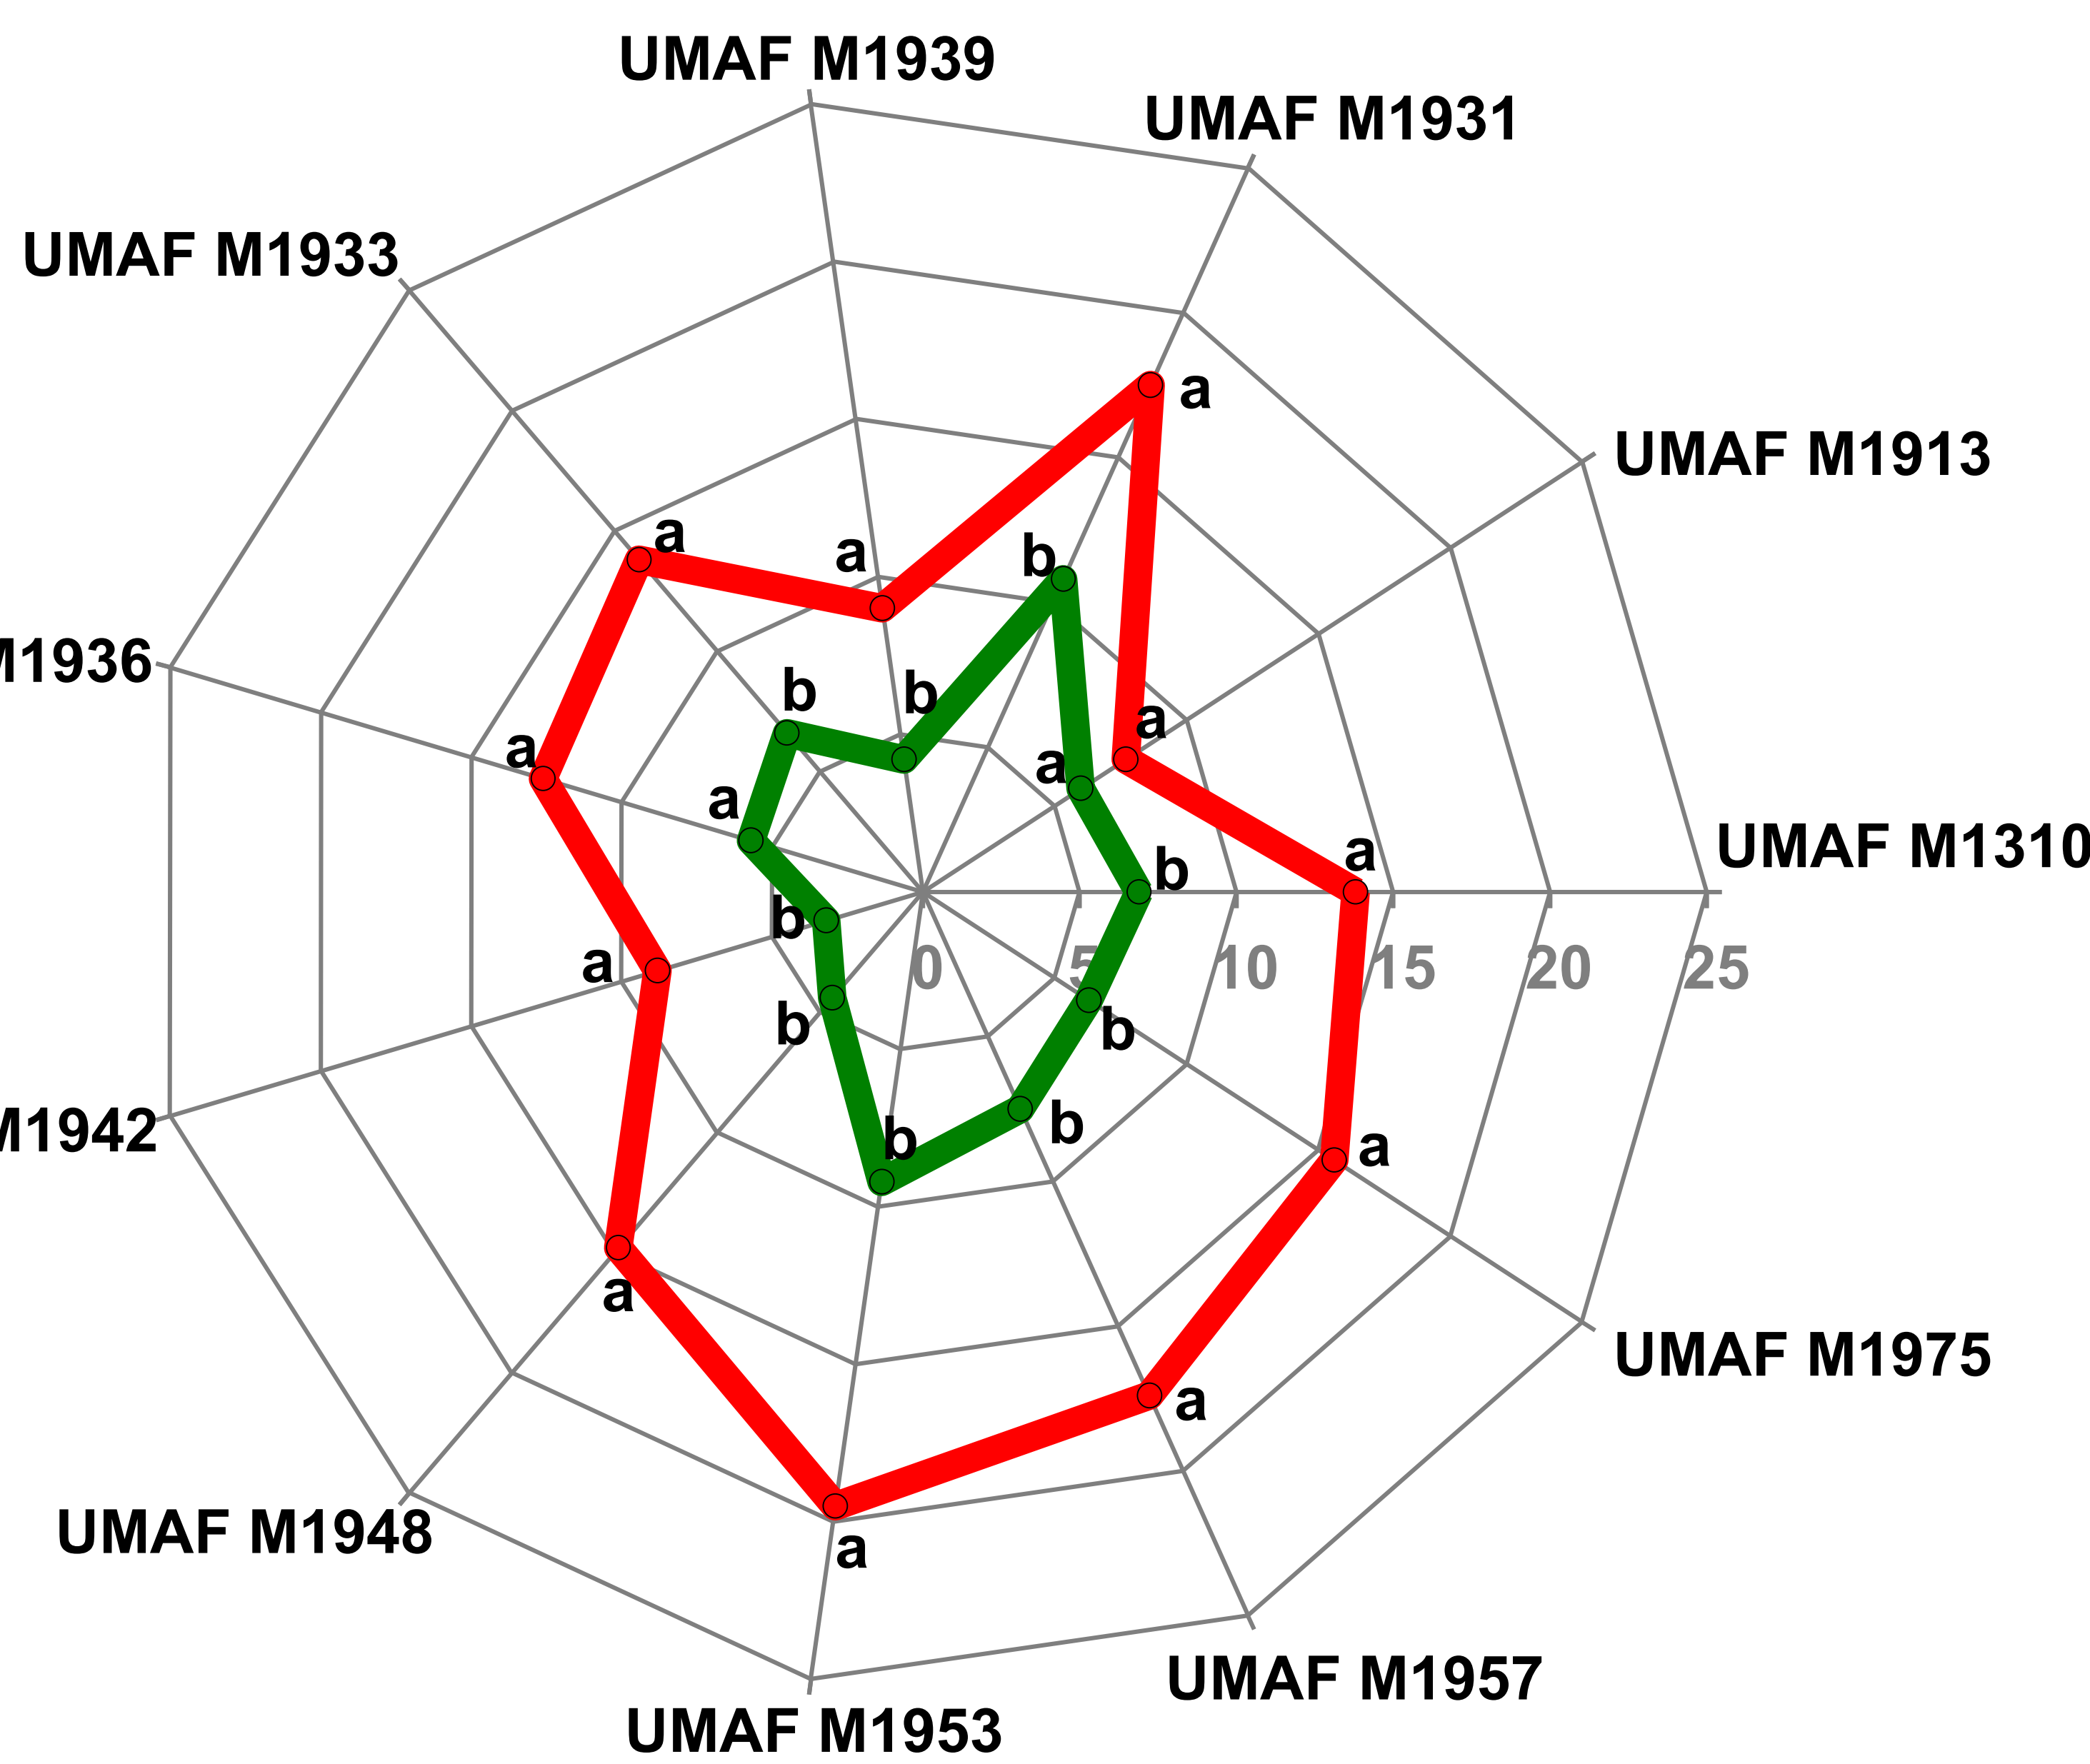

B

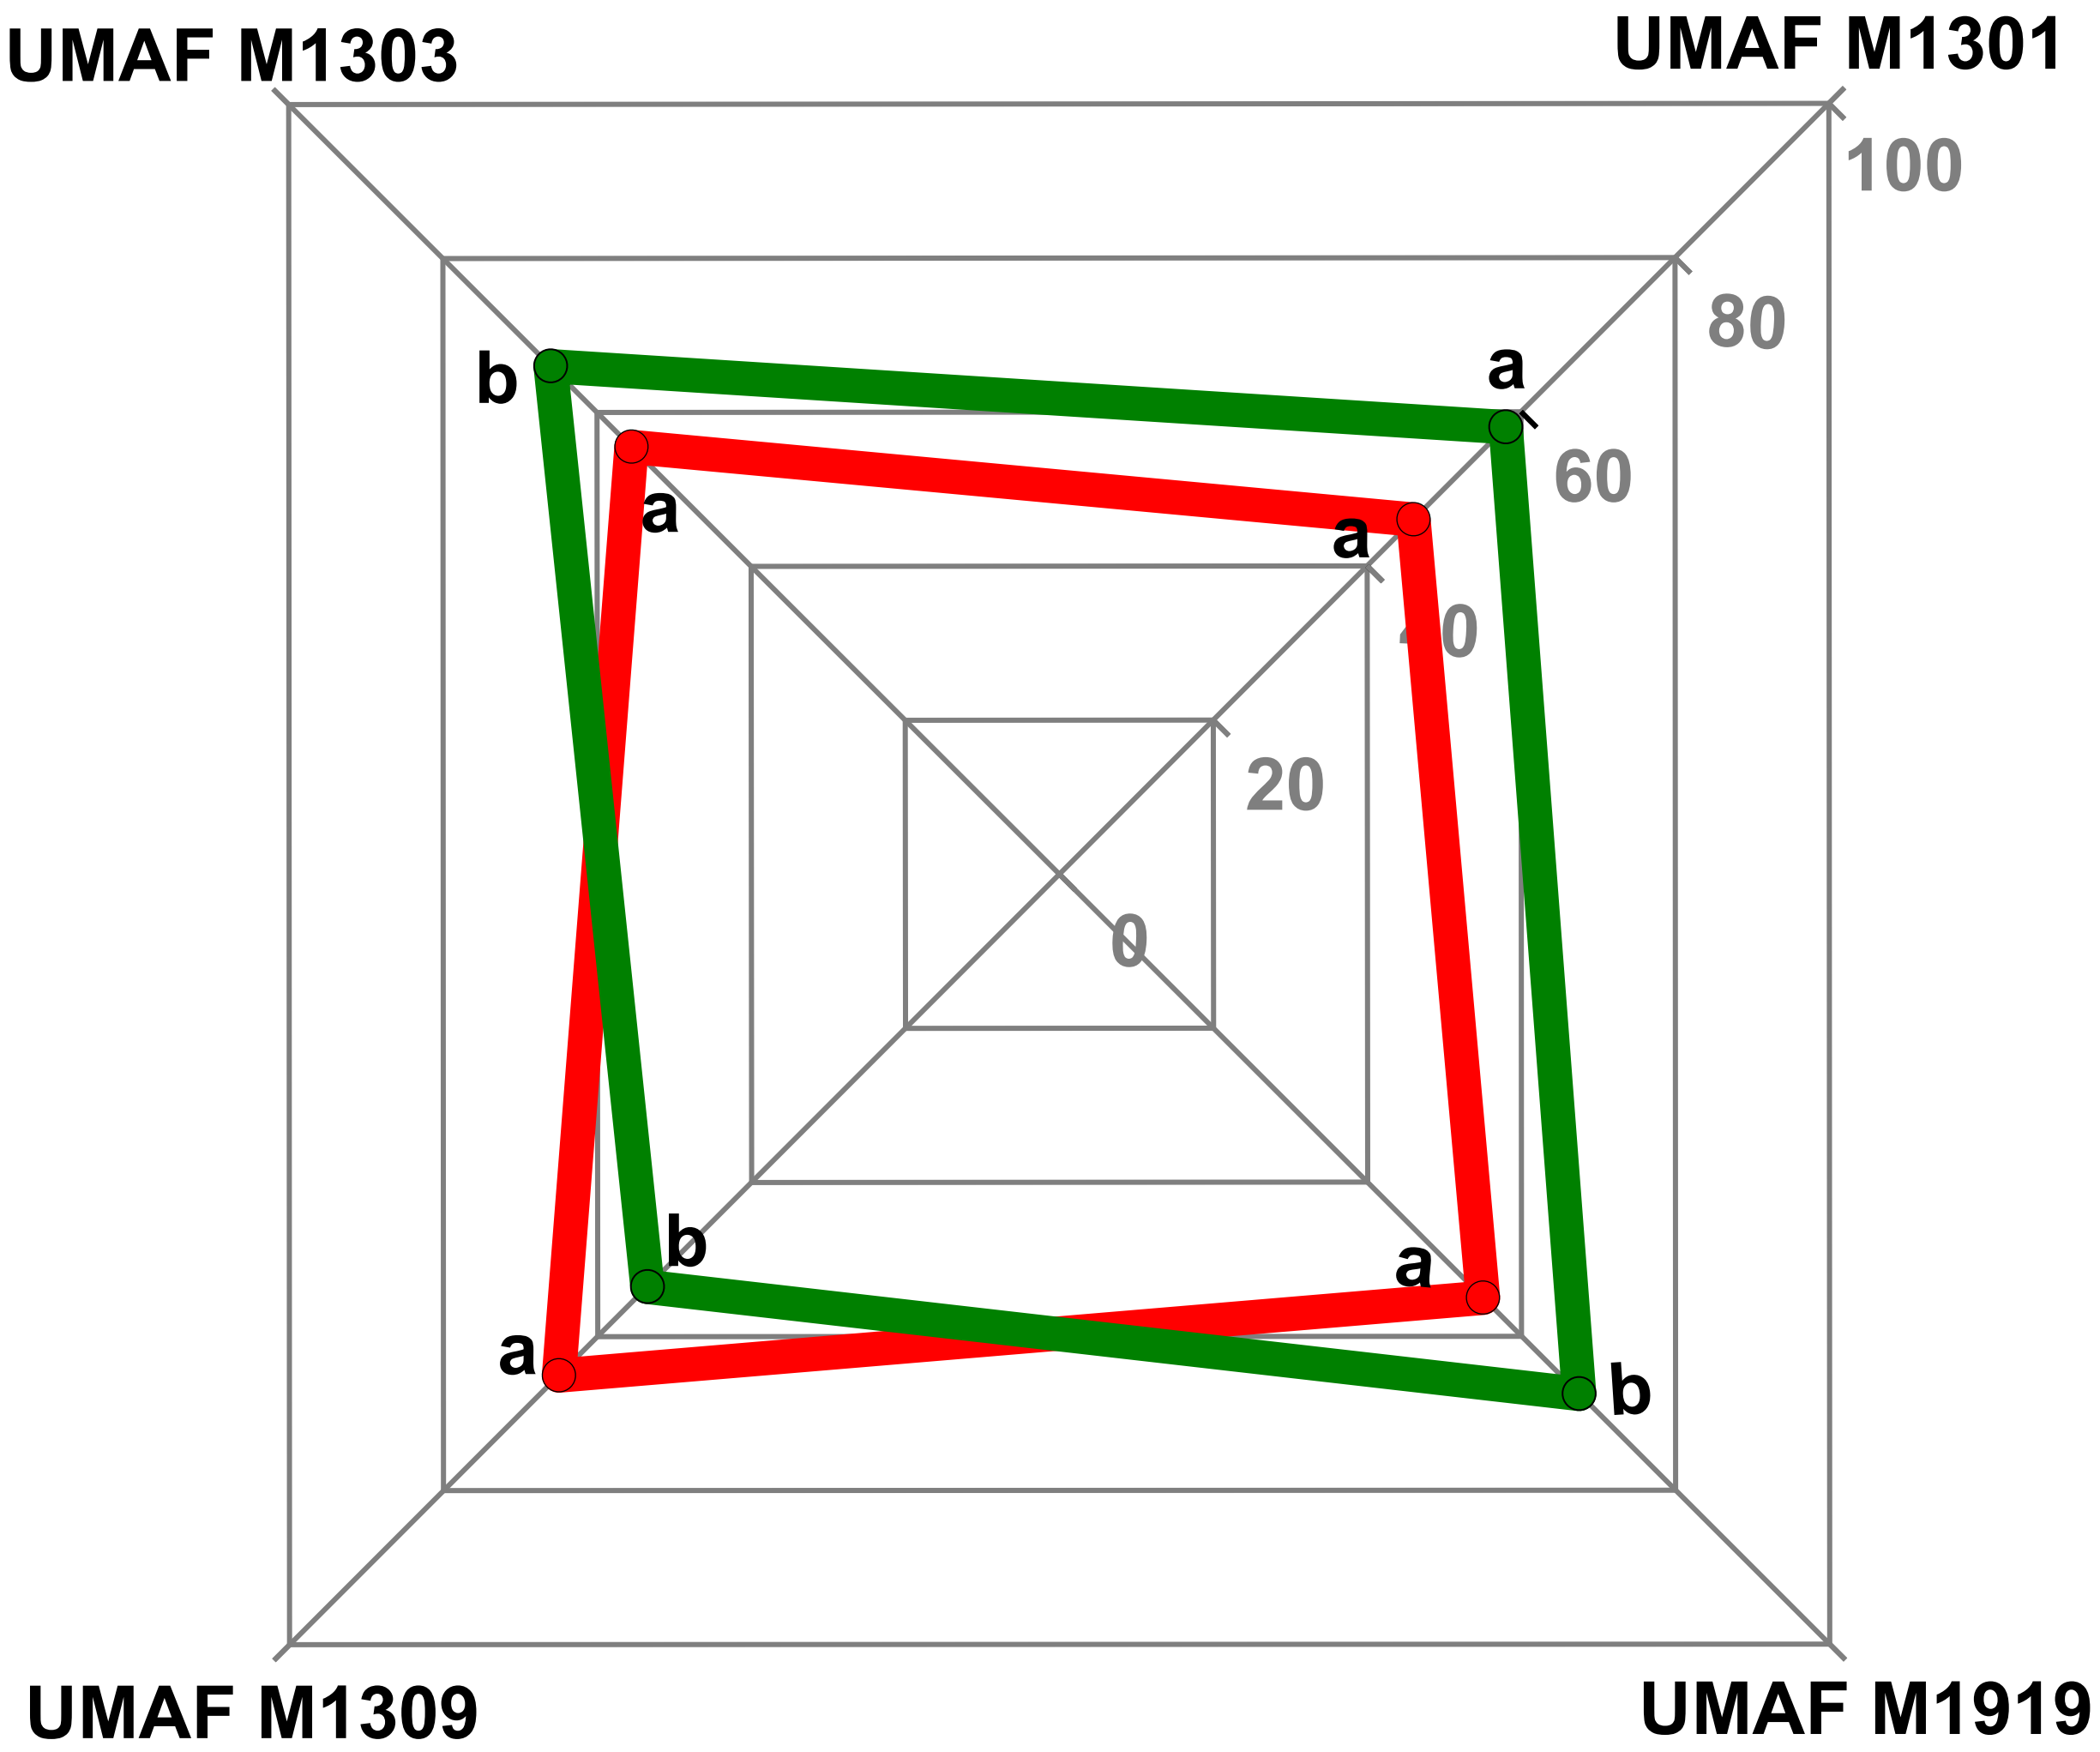

E

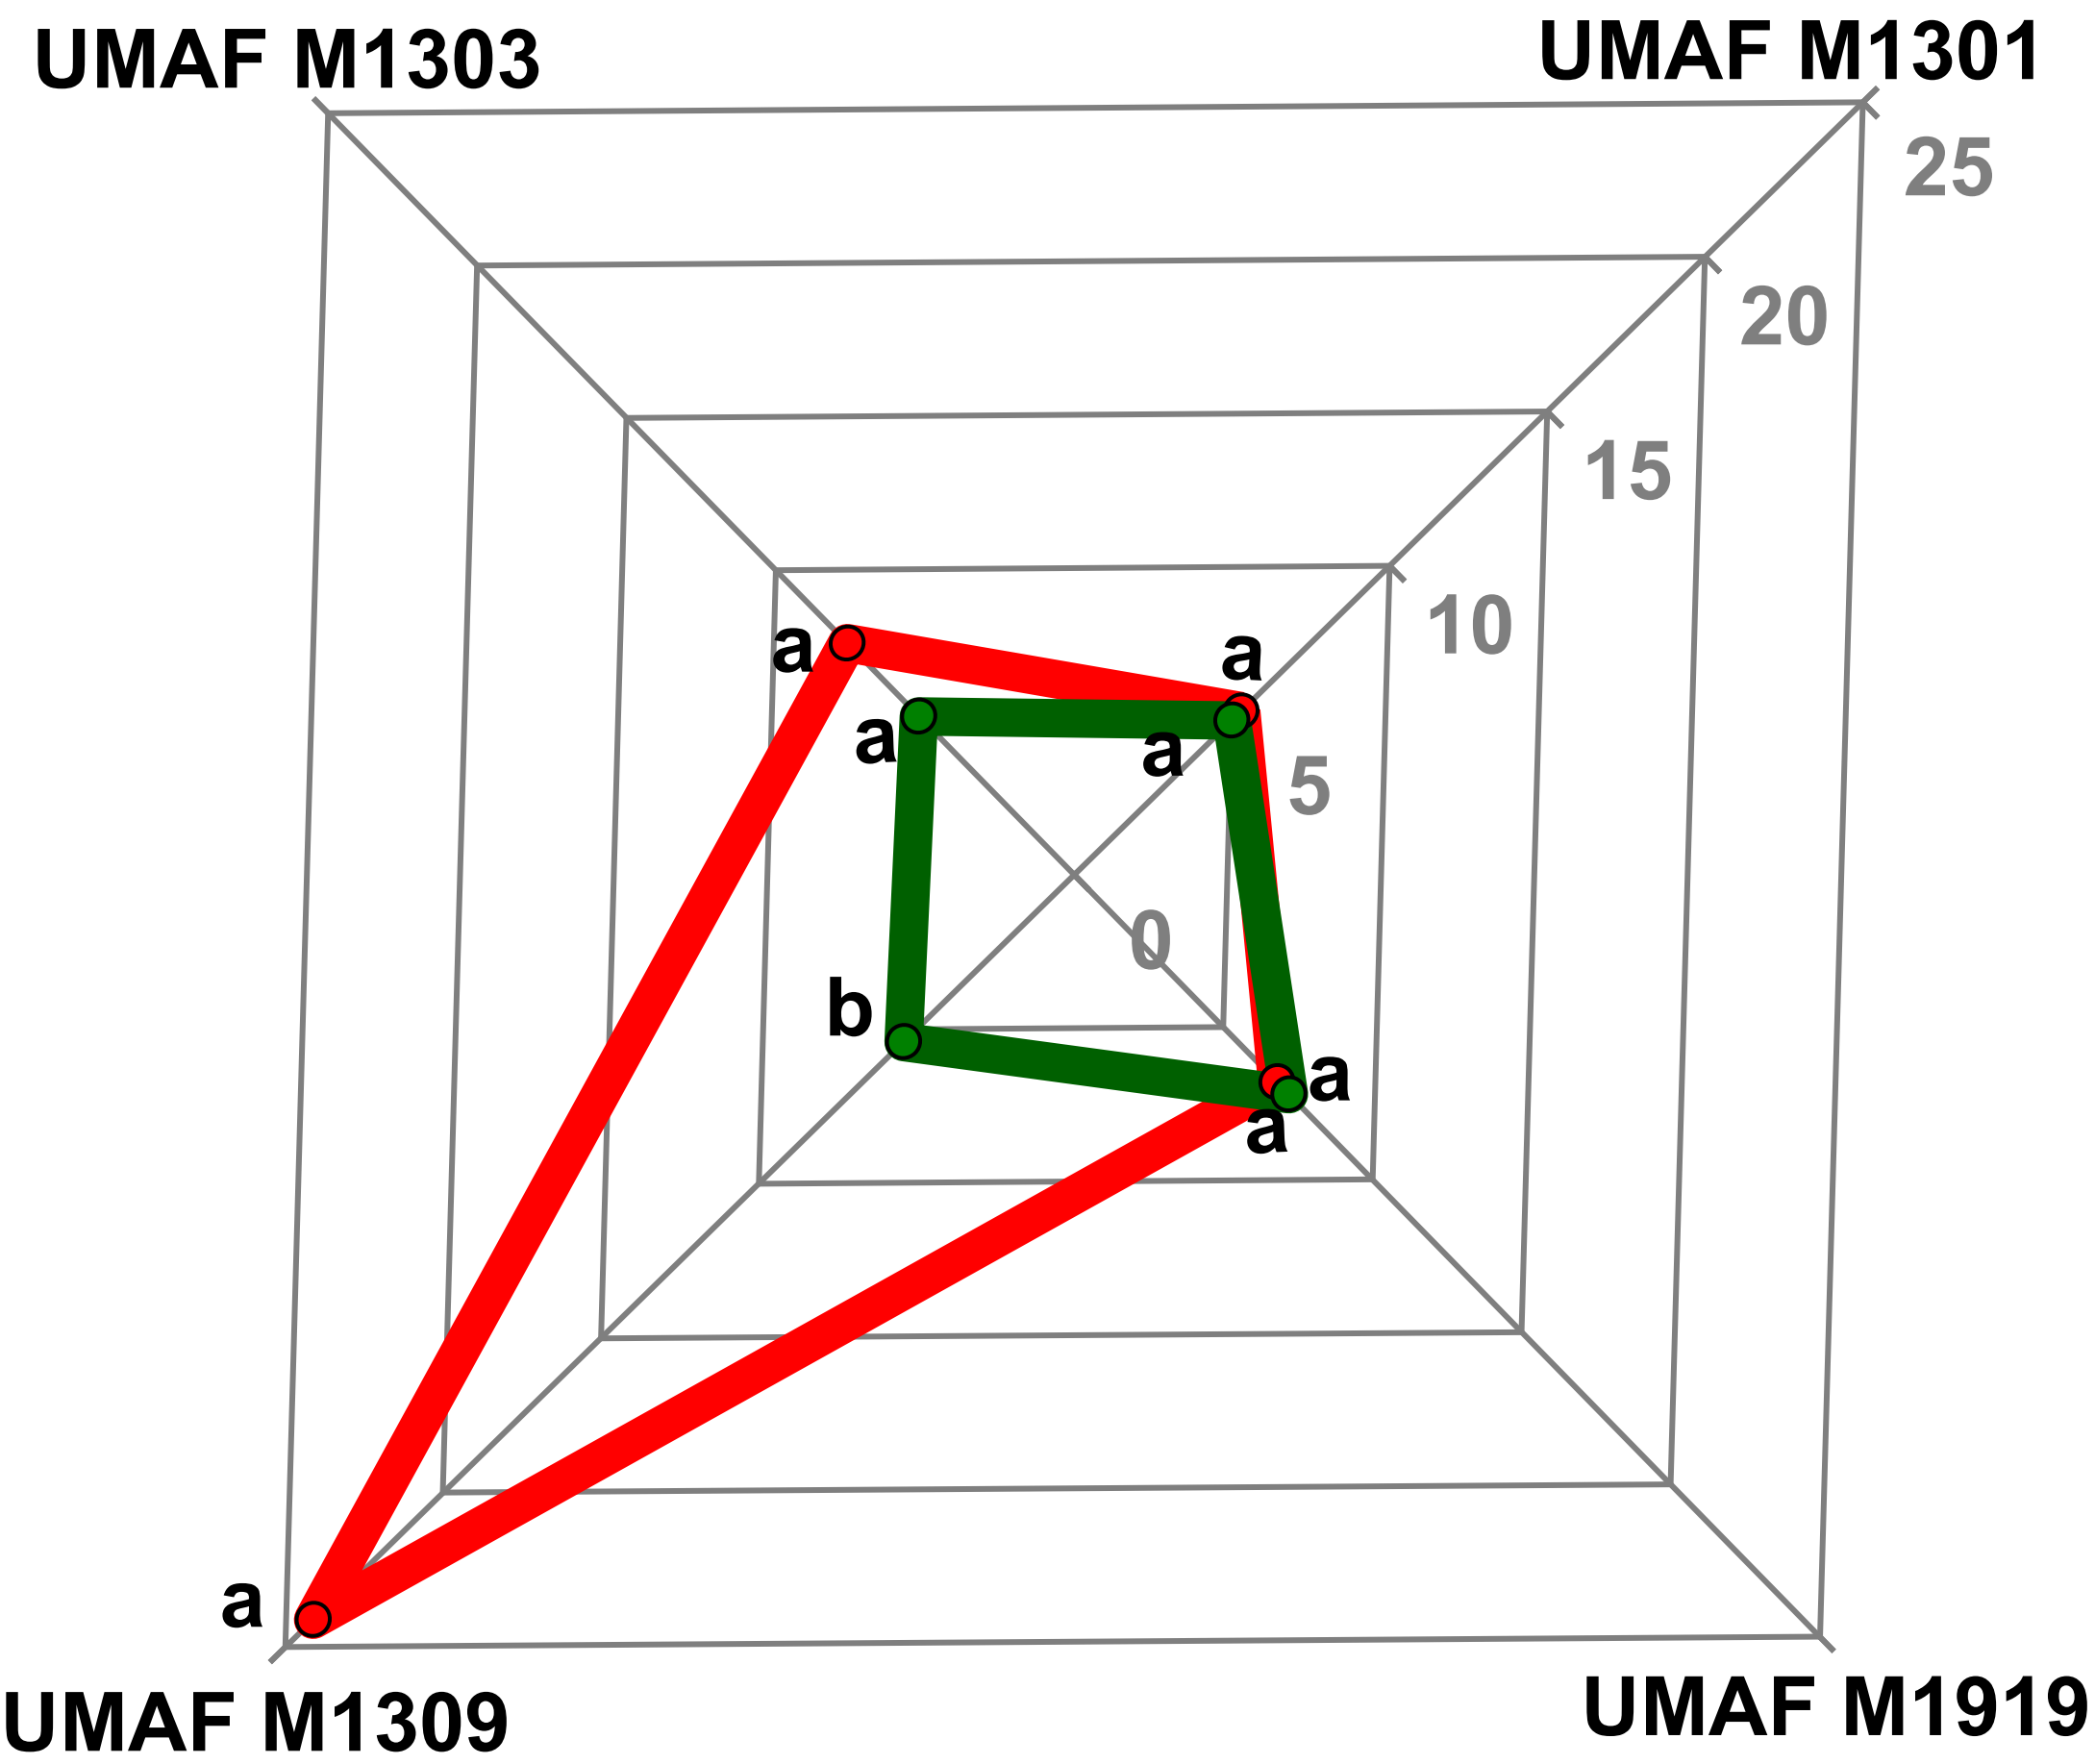

C

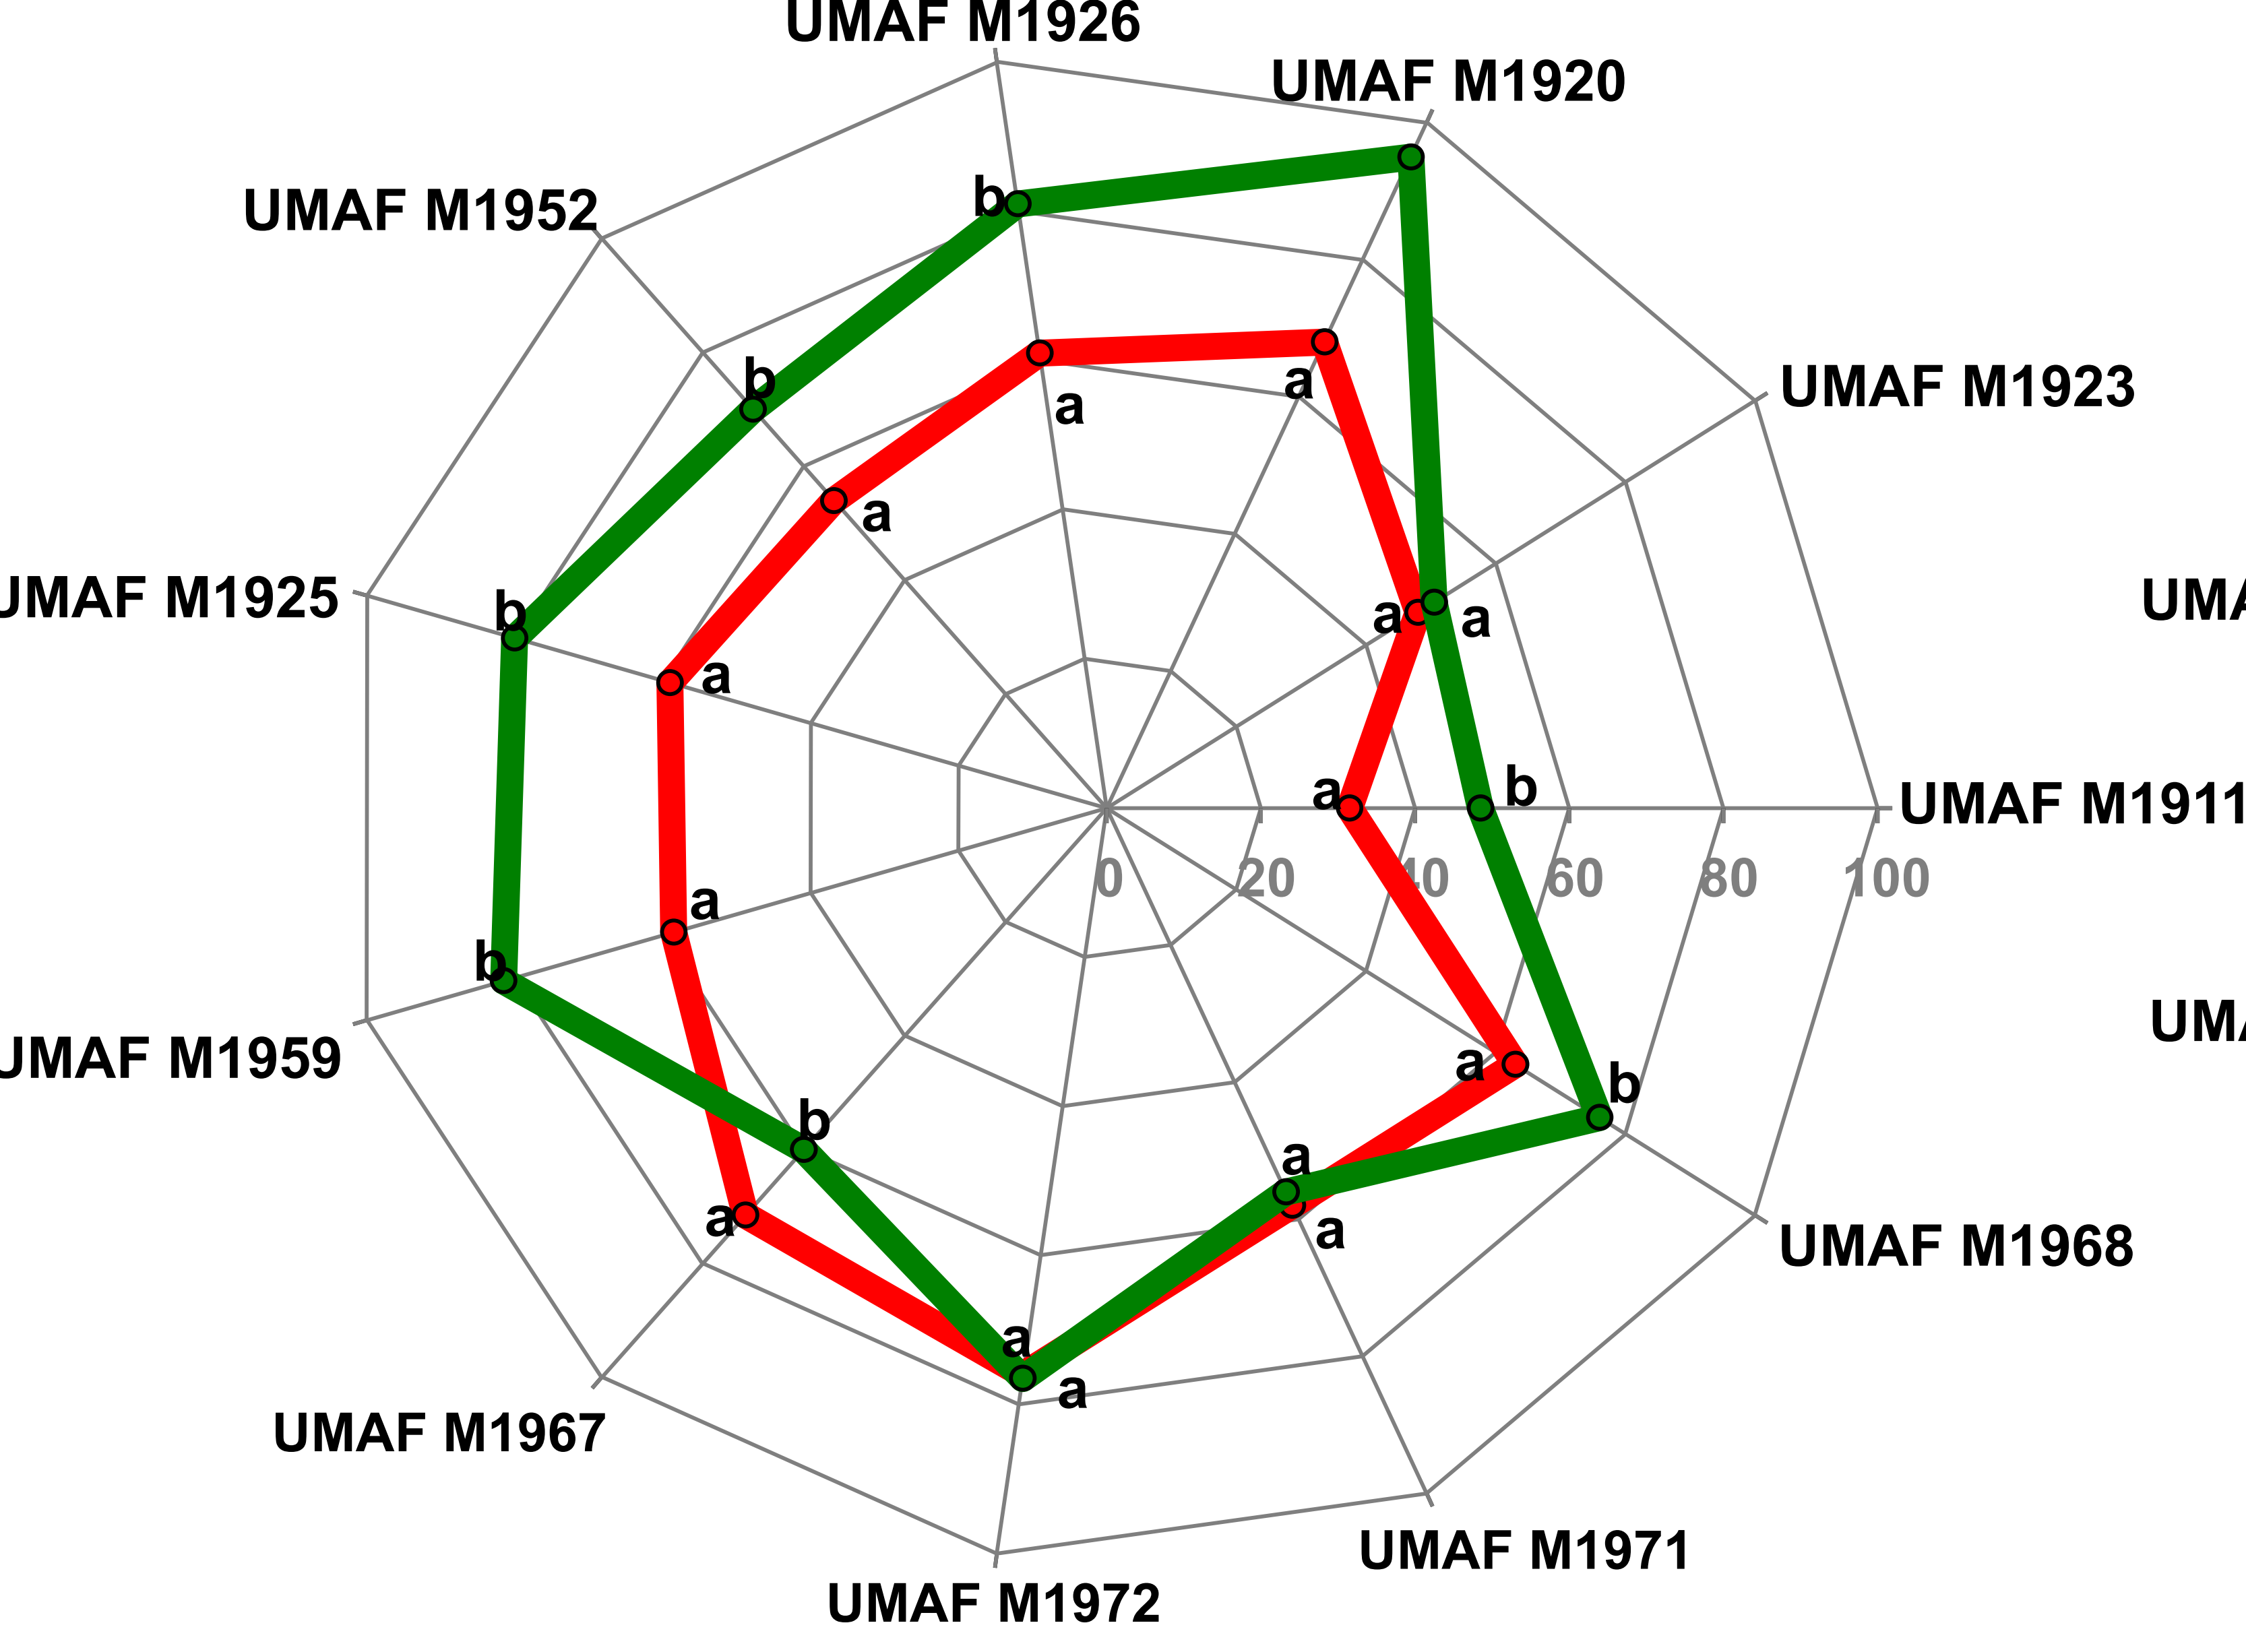

F

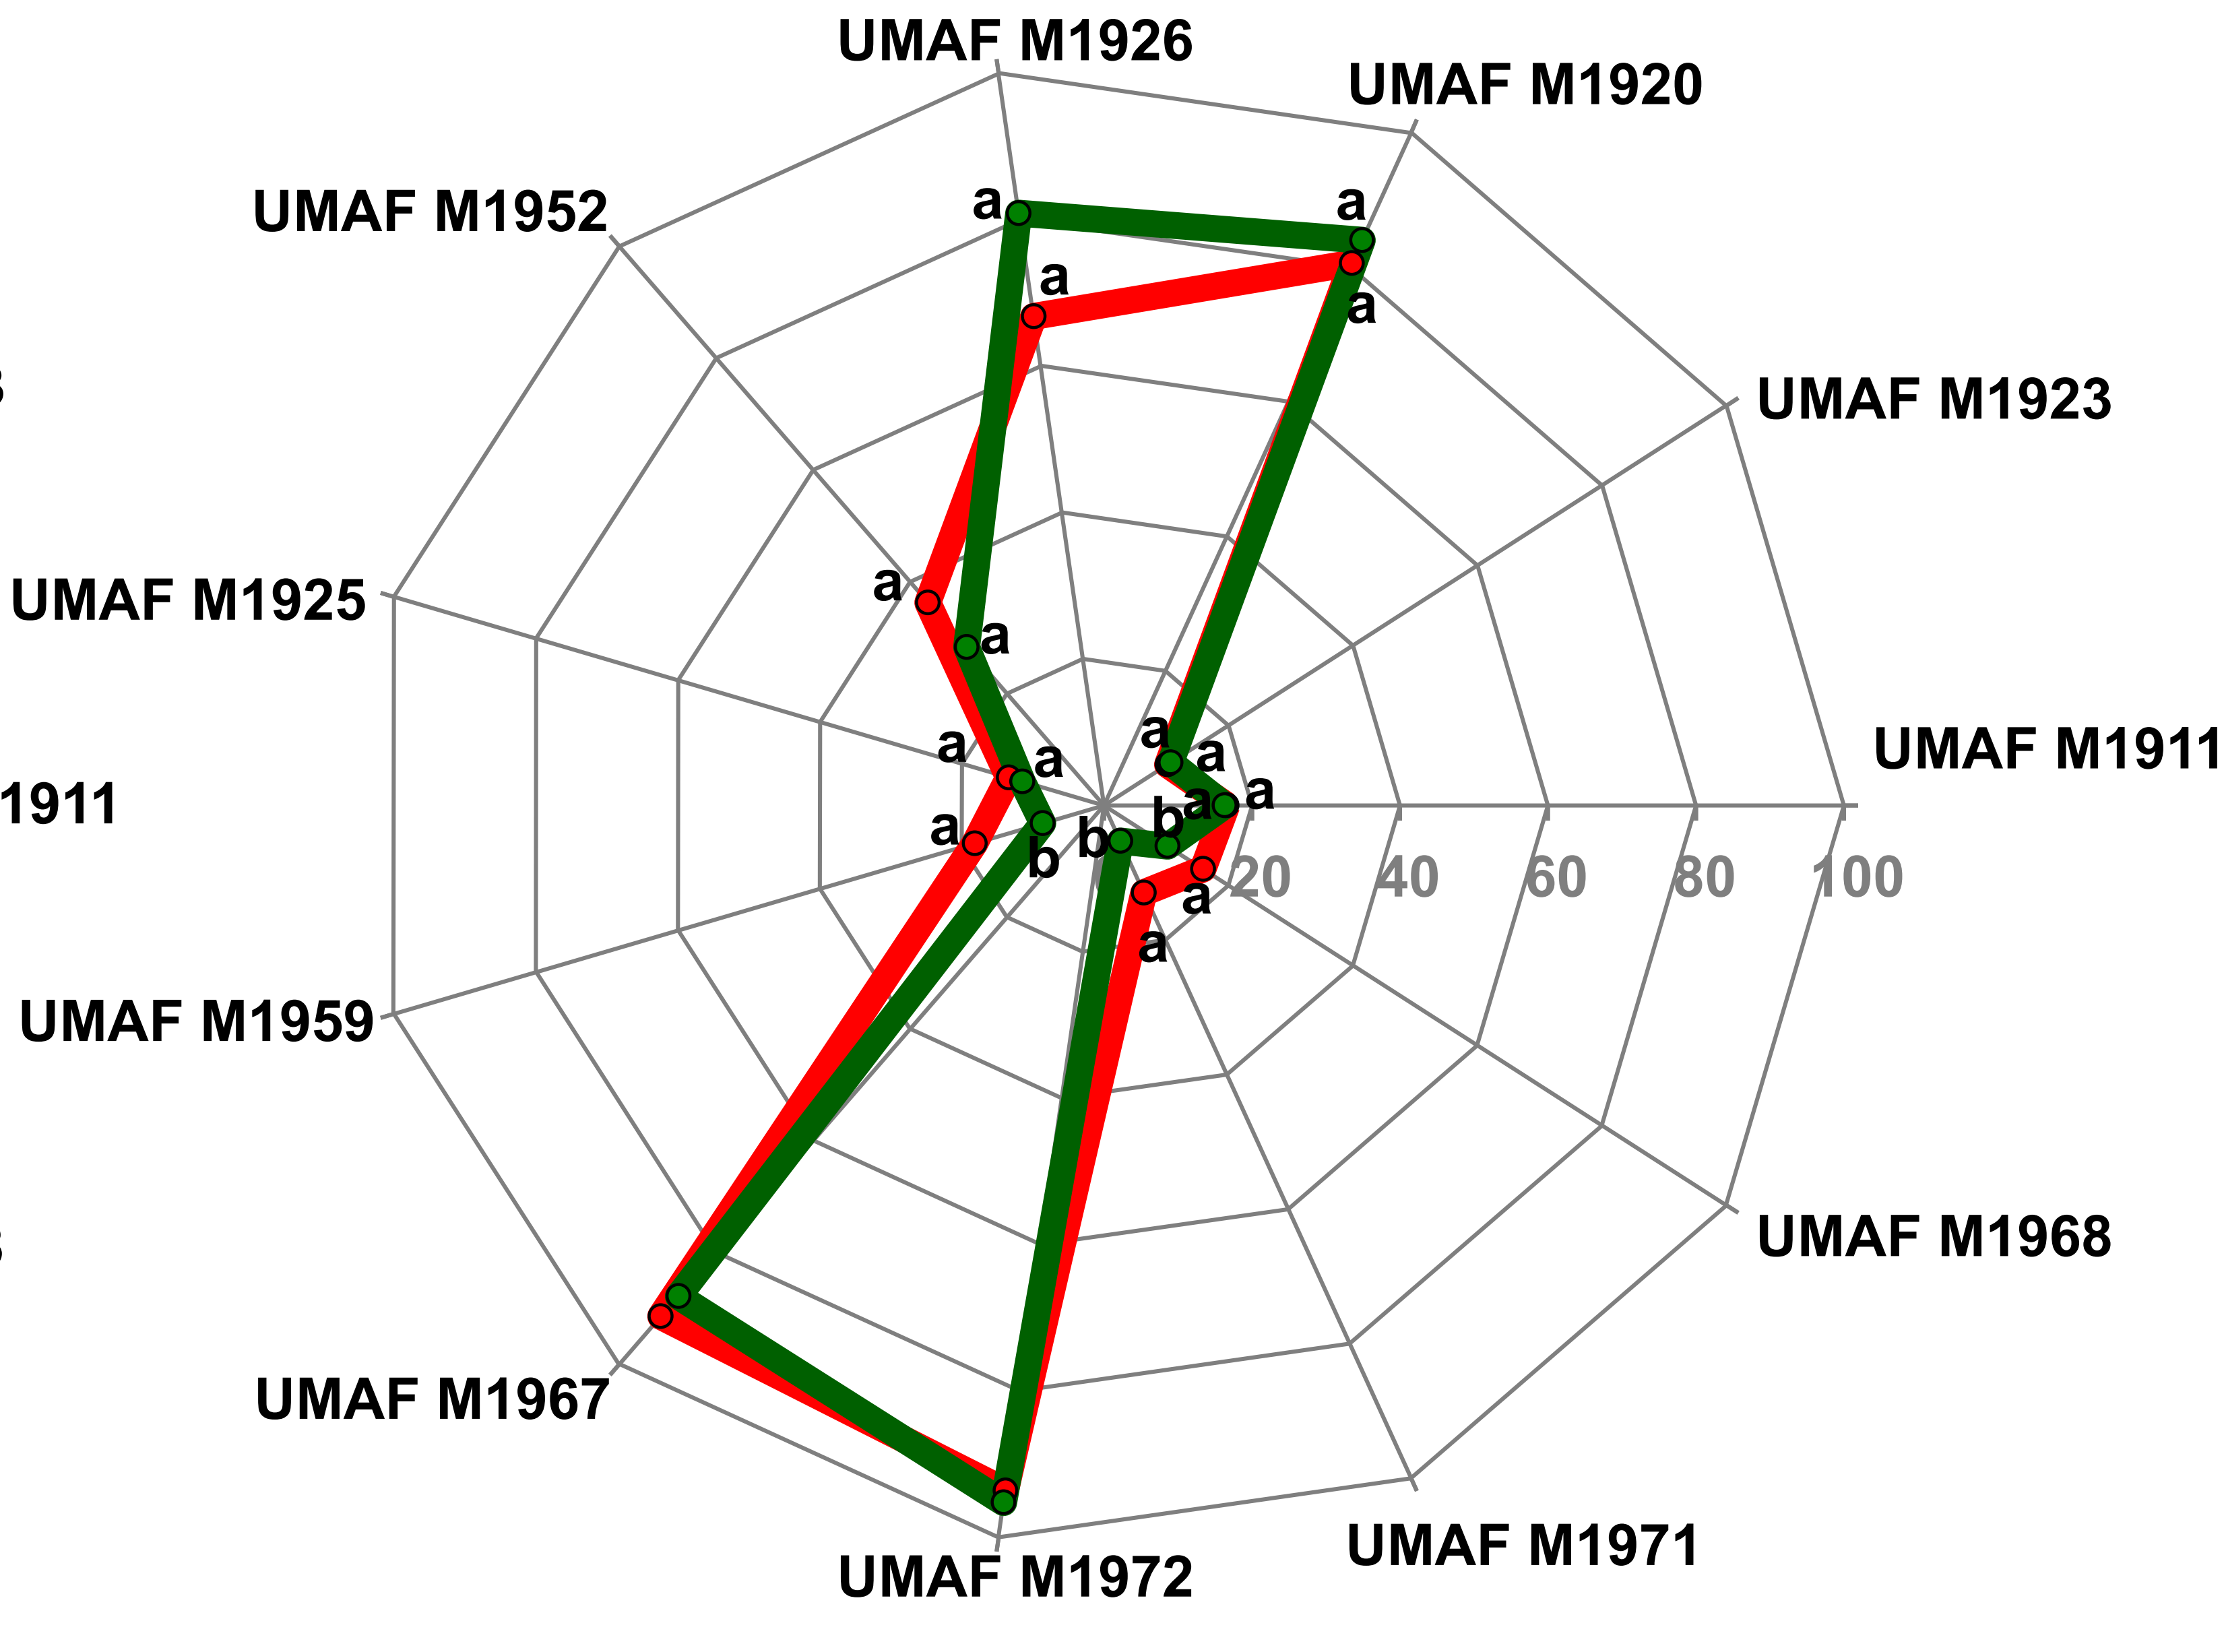

Supplement: s1 [file s1]
